# Supplementary material
Source: PubMed Central journal article supplement (PMC6583637)
Supplement: jamapediatr-171-1168-s001.pdf [file jamapediatr-171-1168-s001.pdf]

## Supplementary Online Content

Luby JL, Barch D, Whalen D, Tillman R, Belden A. Association between early life adversity and risk for poor emotional and physical health in adolescence: a putative mechanistic neurodevelopmental pathway. *JAMA Pediatr*. Published online October 30, 2017. doi:10.1001/jamapediatrics.2017.3009

**eTable.** Multivariate regression of 5 Frontal Cortex Regions by Early ACEs  
Covarying for Sex and Age at Scan

This supplementary material has been provided by the authors to give readers additional information about their work.

**eTable. Multivariate regression of 5 Frontal Cortex Regions by Early ACEs Covarying for Sex and Age at Scan**

|                               | <b>Value</b>    | <b>F Value</b> | <b>df</b> | <b>p</b>      |
|-------------------------------|-----------------|----------------|-----------|---------------|
| Wilks' lambda                 | 0.896           | 3.09           | 5/133     | 0.0113        |
|                               |                 |                |           |               |
| <b>Superior frontal gyrus</b> | <b>Estimate</b> | <b>SE</b>      | <b>t</b>  | <b>p</b>      |
| Early ACEs                    | -0.055          | 0.145          | -0.38     | 0.7062        |
| Male sex                      | 3.167           | 0.944          | 3.36      | 0.0010        |
| Age at scan                   | 0.486           | 0.374          | 1.30      | 0.1957        |
| <b>Middle frontal gyrus</b>   |                 |                |           |               |
| Early ACEs                    | 0.002           | 0.148          | 0.01      | 0.9903        |
| Male sex                      | 3.582           | 0.962          | 3.72      | 0.0003        |
| Age at scan                   | 0.518           | 0.382          | 1.36      | 0.1772        |
| <b>Inferior frontal gyrus</b> |                 |                |           |               |
| Early ACEs                    | -0.223          | 0.071          | -3.14     | <b>0.0020</b> |
| Male sex                      | 0.875           | 0.462          | 1.90      | 0.0601        |
| Age at scan                   | -0.087          | 0.183          | -0.48     | 0.6346        |
| <b>Orbital cortex</b>         |                 |                |           |               |
| Early ACEs                    | -0.112          | 0.075          | -1.50     | 0.1370        |
| Male sex                      | 1.645           | 0.486          | 3.38      | 0.0009        |
| Age at scan                   | -0.044          | 0.193          | -0.23     | 0.8182        |
| <b>Frontal pole</b>           |                 |                |           |               |
| Early ACEs                    | -0.000          | 0.009          | -0.01     | 0.9937        |
| Male sex                      | 0.106           | 0.056          | 1.89      | 0.0603        |
| Age at scan                   | 0.006           | 0.022          | 0.29      | 0.7748        |
